1 **The interaction of climate history and evolution impacts alpine biodiversity assembly**  
2 **differently in freshwater and on land**

3 Luiz Jardim-deQueiroz<sup>1,2</sup>, Carmela J. Doenz<sup>1,2</sup>, Florian Altermatt<sup>3,4</sup>, Roman Alther<sup>3,4</sup>, Špela  
4 Borko<sup>5</sup>, Jakob Brodersen<sup>1,2</sup>, Martin M. Gossner<sup>6,7</sup>, Catherine Graham<sup>6</sup>, Blake Matthews<sup>1,2</sup>,  
5 Ian R. McFadden<sup>6,7</sup>, Loïc Pellissier<sup>6,7</sup>, Thomas Schmitt<sup>8,9</sup>, Oliver M. Selz<sup>1,\*</sup>, Soraya Villalba<sup>1</sup>,  
6 Lukas Rüber<sup>2,10</sup>, Niklaus Zimmermann<sup>6,7</sup>, Ole Seehausen<sup>1,2,‡</sup>

7 <sup>1</sup> Department of Fish Ecology and Evolution, Swiss Federal Institute of Aquatic Science and  
8 Technology (Eawag), Switzerland.

9 <sup>2</sup> Institute of Ecology and Evolution, University of Bern, Switzerland.

10 <sup>3</sup> Department of Aquatic Ecology, Swiss Federal Institute of Aquatic Science and  
11 Technology (Eawag), Switzerland.

12 <sup>4</sup> Department of Evolutionary Biology and Environmental Studies, University of Zurich,  
13 Switzerland.

14 <sup>5</sup> SubBio Lab, Department of Biology, Biotechnical Faculty, University of Ljubljana,  
15 Slovenia.

16 <sup>6</sup> Swiss Federal Institute for Forest, Snow and Landscape Research (WSL), Switzerland.

17 <sup>7</sup> Department of Environmental Systems Science, Swiss Federal Institute of Technology in  
18 Zürich (ETHZ), Switzerland.

19 <sup>8</sup> Senckenberg German Entomological Institute, Germany.

20 <sup>9</sup> Institute of Biochemistry and Biology, Faculty of Science, University of Potsdam,  
21 Germany.

22 <sup>10</sup> Naturhistorisches Museum Bern (NMBE), Switzerland.

23 ORCIDs: LJQ: 0000-0002-5524-6281; CJD: 0000-0003-4143-7623; FA: 0000-0002-4831-  
24 6958; RA: 0000-0001-7582-3966; ŠP: 0000-0002-8383-8778; JB: 0000-0003-2060-6379;  
25 MMG: 0000-0003-1516-6364; CG: 0000-0001-9267-7948; BM: 0000-0001-9089-704X;  
26 IRM: 0000-0002-4508-7272; LP: 0000-0002-2289-8259; TS: 0000-0002-1389-8396; OMS:  
27 0000-0002-2210-5909; LR: 0000-0003-0125-008X; NZ: 0000-0003-3099-9604; OS: 0000-  
28 0001-6598-1434.

29 \* Authorship alphabetically ordered from FA to SV.

30 ‡ Corresponding author: Ole.Seehausen@eawag.ch; Ole.Seehausen@iee.unibe.ch.

31 **Abstract**

32 Quaternary climate fluctuations can affect biodiversity assembly through speciation in two  
33 non-mutually-exclusive ways: a glacial species pump, where isolation in glacial refugia  
34 accelerates allopatric speciation, and adaptive radiation during ice-free periods. Here we  
35 detected biogeographic and genetic signatures associated with both mechanisms in the  
36 generation of the European Alps biodiversity. Age distributions of endemic and widespread  
37 species within aquatic and terrestrial taxa (amphipods, fishes, amphibians, butterflies and  
38 flowering plants) revealed that endemic fish evolved only in lakes, are highly sympatric and  
39 mainly of Holocene age, consistent with adaptive radiation. Endemic amphipods are ancient,  
40 suggesting preglacial radiation with limited range expansion and local Pleistocene survival,  
41 perhaps facilitated by a groundwater-dwelling lifestyle. Terrestrial endemics are mostly of  
42 Pleistocene age, and are thus more consistent with the glacial species pump. The lack of  
43 evidence for Holocene adaptive radiation in the terrestrial biome may be attributable to a  
44 faster range expansion of these taxa after glacial retreats, though fewer stable environments  
45 may also have contributed to differences between terrestrial areas and lakes. The high  
46 proportion of young, endemic species make the Alps vulnerable to climate change, but the  
47 mechanisms and consequences of species loss will likely differ between biomes because of  
48 their distinct histories.

49 **Keywords:** Time for speciation, Allopatric speciation, Adaptive radiation, Pleistocene  
50 refugia, Glacial species pump, European Alps

51 **1. Background**

52 Immigration, speciation and extinction are the three main processes underlying the assembly  
53 of biodiversity in island-like habitats [1–4]. The relative contribution of these processes  
54 depends on size, isolation and fragmentation of the region, ecosystem or habitat. For instance,  
55 immigration rates decrease with increasing isolation, extinction rates decrease with increasing  
56 area, and rates of in situ speciation increase with both area, isolation, and fragmentation  
57 [1,2,5–7]. The occurrence and interaction of these processes over geological history leave  
58 strong imprints in the contemporary structure of regional and local species assemblages,  
59 including phylogenetic structure and relatedness. The species age distribution, and the nature  
60 and degree of endemism are some of the resulting biodiversity features [8].

61 Some of the mechanisms that can lead to endemism are through cladogenetic speciation, i.e.,  
62 when an ancestral species diverges into two or more derived species within an island,

63 archipelago or geographic region, or through anagenetic speciation, when a local or regional  
64 population or set of populations diverges from its progenitors outside the island, archipelago  
65 or region [3]. Recent cladogenetic and anagenetic speciation both result in neoendemic  
66 species, which are young species with geographically restricted distributions. Moreover, if  
67 cladogenetic and anagenetic speciation are the main processes behind regional biodiversity  
68 assembly, a regional biota can be composed of many relatively young and closely related  
69 species. Non-endemic species, in turn, are generally more widespread because they either  
70 have immigrated to the focal region from the outside after range expansion or they have  
71 arisen in the focal region and had time to spread beyond it. Such non-endemic species are  
72 also expected to be older, according to the ‘age and area’ hypothesis [9], which predicts that  
73 older species have had more time to disperse and hence become geographically more  
74 widespread, whereas younger species often are still confined to smaller ranges. However, the  
75 ‘age and area’ hypothesis assumes biome stability (including climatic stability) and does not  
76 consider factors other than age that could in fact have strong effects on species range sizes.  
77 For instance, population extirpation or local extinction [10], the presence and movement of  
78 physical or climatic barriers in space and time [11], changes in habitat size through time,  
79 variation between lineages in the ecological versatility and evolutionary adaptability of  
80 species [12], variation in species dispersal ability [13,14] and ecological interactions [15] can  
81 all be important predictors of species range size in addition to species age. The interaction of  
82 these factors can explain, for instance, why some species, despite being so old, are  
83 geographically narrowly confined in the present time (geographical relicts or paleoendemics)  
84 [16].

85 Physically rugged mountain landscapes at lower and intermediate latitude, such as those of  
86 the Alpine bioregion of Europe (hereafter the European Alps), are hotspots of biodiversity  
87 and endemism [17–19]. In such environments, endemism and species radiations arise through  
88 the interaction of dispersal limitation with steep ecological gradients and often archipelago-  
89 like habitat structures [20–23]. In the European Alps, multiple terrestrial taxa have undergone  
90 local radiations leading to the emergence of endemic clades in several groups such as  
91 flowering plants [24–26] or butterflies [27,28]. Furthermore, some of the largest endemic  
92 radiations in European freshwater habitats also took place in or around the Alps, especially  
93 for amphipods [29–32] and fish [33,34]. Importantly, these radiations occurred in habitats  
94 that are geographically isolated from similar habitats elsewhere, but surrounded by less  
95 isolated habitats, containing diverse assemblages of widely distributed taxa. For example,

96 mountain-tops surrounded by lowlands, or permanently cold, deep lakes isolated from other  
97 such lakes by the seasonally relatively warm, shallow flowing water of rivers.

98 The climatic and habitat instability driven by the Quaternary climate fluctuations [35] has  
99 interacted evolutionary and ecological processes to shape biodiversity in the Alps [34,36–41].  
100 This includes influences on speciation, extinction and immigration of lineages, and the  
101 reshaping of species abundance, range distribution, richness and genetic diversity patterns  
102 [42–44]. An important fraction of biodiversity in the Alps is due to recently colonizing  
103 species that immigrated into the region from far away (such as central Asia), or expanded  
104 their range from adjacent regions but have not yet speciated in the area. On the other hand,  
105 endemic biodiversity may have emerged through two alternative, non-exclusive mechanisms  
106 both driven by the succession of glacial–interglacial cycles: (1) the glacial species pump  
107 [45,46], and (2) adaptive radiation during interglacial periods (hereafter adaptive radiation)  
108 [47] (figure 1). The glacial species pump is a process in which allopatric speciation is  
109 accelerated via the isolation of small populations in glacial refugia. It operates when the  
110 expansion of glaciers makes large areas of a species’ range unavailable, but leaves isolated  
111 pockets of suitable habitat (figure 1b; Hewitt 2000; Hewitt 2004; Holderegger and Thiel-  
112 Egenter 2009; April et al. 2013). It can therefore be expected that glacial pump creates  
113 assemblages composed of many species that originally emerged in allopatry (figure 1c) but  
114 might have come into secondary contact more recently (figure 1e). The role of refugia in  
115 promoting species persistence and in glacial vicariant speciation has been widely reported for  
116 multiple extant European taxa, both animals and plants [36,37,e.g. 50–53].

117 After each glacial maximum, the retreat of glaciers opens up new, unoccupied habitat in both  
118 terrestrial and aquatic ecosystems, which may lead early colonists to diversify *in situ* via  
119 adaptive radiations [54] (figure 1b). Adaptive radiation takes place when an ancestor  
120 diversifies ecologically and phenotypically, giving rise in a relatively short period of time, to  
121 multiple species that are ecologically distinct [55]. Emblematic examples of adaptive  
122 radiation during inter- or postglacial periods are associated the emergence of many lakes in  
123 the Holarctic realm by the end of the last glacial period, providing opportunities for many  
124 radiations of freshwater fish that occurred in parallel [33,34,47,56–59]. Such process would  
125 be expected to generate sympatric or parapatric species by *in situ* cladogenetic speciation  
126 [23]. In addition, postglacial expansion of populations also has the potential to bring together  
127 lineages that had previously diverged in Pleistocene refugia [60]. Secondary contact of  
128 lineages can also be important in adaptive radiation, either through causing ecological

129 character displacement in sympatry occurring in response to competition [55] (Schluter  
130 2000, or through the occurrence of hybridization which may facilitate the onset of adaptive  
131 radiations upon colonization of new environments [61,62]. This ‘hybrid swarm origin’  
132 hypothesis of adaptive radiation posits that functional genetic variation, which becomes  
133 enriched in hybrid zones, elevates the evolvability and response to natural selection in hybrid  
134 populations [61,63].

135 Despite its large information content for investigating hypothesis regarding biodiversity  
136 assembly and to understand biogeographic patterns in species distributions [64], few studies  
137 have made use of the species age distribution (SAD) [41,65,66], and fewer had investigated  
138 SAD from a multi-taxon perspective [8,67]. We conducted a comparative phylogenetic  
139 analysis to quantify SADs and the extent and type of endemism in aquatic and terrestrial  
140 ecosystems of the European Alps. Our work focuses on several taxonomic groups:  
141 amphipods, fish, butterflies and amphibians with nearly complete taxon sampling, as well as  
142 15 nearly completely sampled representative genera of perennial flowering angiosperms  
143 plants (henceforth “plants”). We predicted that SADs support a scenario with dominance of  
144 the glacial species pump for the origin of endemism in terrestrial groups, with species dating  
145 to the Pleistocene; whereas SADs may indicate a prominent role of postglacial adaptive  
146 radiation for groups that depend on open water habitats, i.e., fish. This is because high  
147 altitude ranges in the terrestrial habitats became fragmented but not completely erased during  
148 glacial maxima, whereas year-round open water bodies as habitat for fish were entirely absent  
149 during glacial maxima, with a few exceptions at the edge of the southern Alps [68]. We also  
150 predicted that SADs of both amphipods and amphibians will resemble fully terrestrial taxa  
151 more than those of fish. Amphipods occupy both open and subterranean freshwater habitats,  
152 and some of the subterranean habitats persisted during the glacial maxima [69], and most  
153 amphibians require open water bodies only during spring and summer and are terrestrial for  
154 the remainder of the year, while some lack an aquatic life stage altogether [70]. Therefore,  
155 some amphibian species likely found Pleistocene refugia within the Alpine region during the  
156 glacial maxima [71,72]. Regarding non-endemic species, we did not expect large differences  
157 in age structure among taxa because non-endemics tend to be widespread, are probably  
158 mostly older and diversified on a wider geographical scale drive by processes that may have  
159 been decoupled from the climate dynamics of the Alps. Therefore, we predicted that non-  
160 endemic species are older on average than endemics. Because dispersal ability, distance  
161 between sink (new habitats that become available after glacial maxima) and sources of

162 colonization, historical stability and heterogeneity of habitat occupied vary between the  
163 taxonomic groups, the magnitude of the difference in species ages between non-endemic and  
164 endemic species will be taxon-dependent.

## 165 **2. Methods**

166 Our work focuses on the European Alps, following previous delimitations of European high  
167 mountain systems [73] but including the peripheral lowland areas, where most of the  
168 perialpine glacial lakes are located. To select the taxonomic groups to be included in this  
169 work, we looked for lineages with reliable distribution data, robust dated phylogenetic trees  
170 that include most of the diversity of the given lineage, and/or genetic data for most of the  
171 recognized species, so that we could estimate and calibrate phylogenetic trees where none  
172 existed. Then, we chose five major taxonomic groups to represent the terrestrial and aquatic  
173 alpine and pre-alpine biomes of the region: nearly all known regional species of amphipods,  
174 fishes, amphibians and butterflies, and 14 nearly completely sampled clades of flowering  
175 plants (*Homogyne*, *Petasites*, *Tussilago*, *Campanula*, *Jasione*, *Phyoplexis*, *Knautia*,  
176 *Androsace*, *Primula*, *Soldanella*, *Gentiana*, *Saxifraga*, *Carex* and *Festuca*). Only species  
177 native to the European Alps were considered. To assemble species age distributions (stem  
178 age, i.e., time since divergence from closest relative in million years, Ma), we combined  
179 published time-trees and our own estimates (electronic Supplementary Methods).

### 180 (a) Endemism and speciation mode

181 Species were considered endemic if they naturally occur only in the alpine and/or perialpine  
182 regions of the Alps. When a species was classified as endemic, we assigned its speciation  
183 mode to anagenetic speciation (Alpine species diverged from its non-Alpine sister species,  
184 but did not undergo *in situ* diversification) or cladogenetic speciation (Alpine species  
185 emerged through *in situ* diversification, with either the non-endemic sister being native to the  
186 region too, or the two or more sister species all being Alpine endemics), following Rosindell  
187 and Phillimore (2011) (electronic supplementary material, tables S1). To apply these  
188 definitions, we first identified the position of each of the endemic species within the  
189 phylogeny (electronic supplementary material, file S2). Then, if the endemic species was  
190 nested within a clade composed mainly of species that occur outside of the Alps, and its  
191 direct sister species occurred only outside the Alps, we assumed anagenetic speciation. If the  
192 species was nested within a group mostly of species native to the Alps, we assumed  
193 cladogenetic speciation.

194 (b) Comparisons of species age distributions

195 We performed multiple permutation tests on the distribution of age estimates assembled from  
196 all the species to identify differences in the age distributions among and within major clades.  
197 Here, we asked 1) whether age distributions differed between endemic and non-endemic  
198 species, overall and within each taxonomic group independently; 2) whether species age  
199 distributions differed among taxonomic groups; 3) whether non-endemic species age  
200 distributions differed among groups; and 4) whether endemic species age distributions  
201 differed among groups. When a difference was significant, if a significant result was found,  
202 we performed post-hoc pairwise permutations to identify which distribution and taxonomic  
203 group (or groups) were distinct from one another, using Bonferroni correction for each group  
204 of analyses. These analyses were performed using the function ‘oneway\_test’ of the library  
205 ‘coin’ [74] in R 4.0.2 1106 [75] with 10,000 resamples with a distribution approximated via  
206 Monte Carlo resampling.

207 **3. Results**

208 A total of 617 species were included in our analyses: 39 amphipods, 124 fishes, 31  
209 amphibians, 245 butterfly and 178 plant species (electronic supplementary material, table  
210 S1). Approximately half of all fish and amphipod species were found to be endemic to the  
211 European Alps (45.2 % and 49 %, respectively), whereas smaller fractions of 12 %, 13 % and  
212 30 % of the butterflies, amphibians and plants, respectively, were found to be endemic (figure  
213 2). Our analysis of speciation mode suggests that approximately half of the endemic  
214 amphipods and plants, and one third of butterfly species emerged by cladogenesis (53 %, 52  
215 % and 36 %, respectively). Cladogenesis was also inferred to be the mode of speciation for  
216 the majority of the endemic amphibian and fish species (75 % and 98 %, respectively) (figure  
217 2).

218 We found that 94 % of the extant species that now occupy the Alps, irrespective of endemism  
219 status, emerged over the past 15 million years (from the Middle Miocene) (figure 2).  
220 Endemics were overall younger than non-endemics (p-value < 0.0001), which was also true  
221 for each taxonomic group when analysed individually (electronic supplementary material,  
222 table S9). We found the species age distributions among non-endemic species to be similar  
223 between taxonomic groups (figure 2), with most of the species ages spanning the Late  
224 Pleistocene to Early Miocene (90 % fell between 0.3 and 20 Mya). The only exception was  
225 the comparison of plants *vs.* amphibians, as we found non-endemic amphibians older than



226 non-endemic plants ( $p < 0.0001$ ; electronic supplementary material S10). SADs of endemic  
227 species were also similar among taxa (90 % fell between 0.25 and 8 Ma), except for fish,  
228 which are younger than any other group (90 % fell between 0.6 and 114 Ky;  $p < 0.0001$ ;  
229 figure 2; electronic supplementary material S11).

230 We observed the following patterns in the SAD: i) endemics are younger than non-endemics  
231 in all taxonomic groups, and ii) there is a high degree of similarity among taxa in the age  
232 distributions when endemics and non-endemics are analysed separately. However, we found  
233 on one hand that while most endemic fish species arose in the Holocene through  
234 cladogenesis, very few endemic butterflies and no endemic species in the other groups arose  
235 in the Holocene. On the other hand, only very few endemic fish (all from the southern  
236 periphery of the Alps) date to the Pleistocene whereas most of the endemic butterflies and  
237 many other endemic species date do.

#### 238 **4. Discussion**

239 Inferring past evolutionary process from the structure of current biodiversity is one of the  
240 goals of macroecology, macroevolution and biogeography. Species age distributions among  
241 regional biota is one informative aspect of this structure [64]. We combined estimates of  
242 species origination times with information on endemism and mode of speciation  
243 (cladogenetic vs. anagenetic) to investigate the dominant mechanisms of biodiversity  
244 assembly in different taxa and major biomes of the European Alps. We found that most of the  
245 species diversity in fish, amphipods, amphibians, butterflies and plants is relatively young,  
246 emerging at the beginning in the Middle Miocene, which coincided with the period of  
247 maximum geological uplift in the region that culminated with the formation of the Alps [76].

248 Our multi-taxon comparative analysis had the advantage of directly comparing independently  
249 evolving and ecologically distinct clades in the same region. It showed that speciation timing  
250 was dramatically different between terrestrial taxa and those aquatic taxa that require  
251 permanent open surface water (i.e., fish). While 80 % of the Alp's endemics in the terrestrial  
252 groups originated between the Late Miocene and Late Pleistocene, most endemic fish species  
253 arose only after the final retreat of the glaciers and re-establishment of permanent open water  
254 bodies in the formerly glaciated areas. Combined with the observation that the vast majority  
255 of endemic fish are products of cladogenetic speciation, this suggests that the assembly  
256 process of the fish fauna of the Alps is dominated by an interaction between colonization  
257 from outside the region and adaptive radiation during the last postglacial period, but similar



258 processes may have cyclically repeated themselves in previous interglacial periods,  
259 alternating with extinction during glacial maxima. In contrast, for the terrestrial groups, our  
260 results suggest that colonization from outside the region and the glacial species pump are the  
261 dominant mechanisms, as anagenetic speciation was more important in these taxa, and  
262 endemic richness assembled throughout the Pleistocene. Interestingly, we observed some  
263 postglacial speciation in butterflies, coinciding with the major mode in fish, but being  
264 dwarfed in butterflies by the much larger Pleistocene mode. We suggest that general, non-  
265 exclusive mechanisms underlay these contrasting patterns: 1) Quaternary climate fluctuations  
266 that accelerate allopatric speciation during cold stages but open up new ecological  
267 opportunities for adaptive radiation during interglacial periods; 2) variation among groups in  
268 their dispersal ability and associated rate of range expansion, and finally 3) the influence of  
269 variation in seasonal and inter-annual habitat stability in either constraining or promoting  
270 adaptive radiation. Below we discuss each of these mechanisms and how they may have  
271 affected diversification in the different taxa studied here.

#### 272 (a) The role of Quaternary climate fluctuations

273 We suggest our finding that most endemic fish are of postglacial origin, while endemics in  
274 other groups arose in the Pleistocene or earlier, is explained by the different effects that the  
275 Quaternary climate oscillations had on freshwater versus terrestrial habitat [68]. Permanent  
276 open surface water habitats, as required by fishes, were absent in the glaciated parts of the  
277 Alps during the Last Glacial Maximum (LGM), because all lakes and river valleys were  
278 covered by thick glaciers. Therefore, the complete lack of endemic fish species older than  
279 20,000 years on the northern and western flanks of the Alps is likely due to local extirpation  
280 of all fish populations across the region during the LGM. With the progressive retreat of  
281 glaciers, which achieved their modern configuration in the Late Holocene, fish would then  
282 have returned to the region from areas located in downstream sections of the large rivers, that  
283 were often far from the alpine region especially on the North face of the Alps [e.g. 77]. This  
284 Holocene recolonization by older widespread species explains the large fraction of old,  
285 widespread and non-endemic fish species in the northern and western Alpine region.

286 The first fish to colonize after the LGM were probably species adapted to cold water  
287 conditions, such as salmonids and sculpins, that would have lived nearby in the rivers of the  
288 Pleistocene tundra downstream of the Alpine glacier shield. Salmonids are indeed known for  
289 their remarkable colonizing ability and rapid establishment in postglacial freshwater habitats

290 [78]. These fish would have encountered ecological opportunities in the emerging large and  
291 deep lakes of the region and radiated into many distinct species as they adapted to the vacant  
292 niches associated with distinct lacustrine zones. This process likely generated the young  
293 endemic species, nowadays predominantly in three lineages, whitefish (*Coregonus* [79]), ,  
294 chars (*Salvelinus* [80]) and sculpins (*Cottus* [34]), that have rapidly radiated in perialpine  
295 lakes. The very few old, relic endemic fish species in the region that date to prior to the  
296 Holocene, are the lake herring *Alosa agone*, and two trouts of the genus *Salmo* (*S. carpio* and  
297 *S. sp.* ‘Blackspot’). These three species are endemic to lakes in Northern Italy and southern  
298 Switzerland, a region where probably not all lakes were fully covered by ice sheets during the  
299 LGM [68]. Therefore, these species likely originated during earlier interglacials, when  
300 southern perialpine lakes would have become extensive, and then found refugia during the  
301 LGM to persist to the present day [81]. That there are no young postglacial species among the  
302 non-endemic fish is perhaps due to insufficient time and connectivity between lakes to allow  
303 new species to arise in deep lakes elsewhere in Europe (e.g., in northern Germany and  
304 Scandinavia) in the Holocene prior to expanding their range into the Alps or vice-versa. It is  
305 important to mention that adaptive radiation of fish are far more frequent in deep lakes  
306 [82,83], while riverine adaptive radiations are rare (but see [84–86]).

307 Unlike for fish, our analysis revealed that all endemic (and all nonendemic) amphipods, the  
308 second fully aquatic taxon in our data, emerged during or before the Pleistocene. This could  
309 be because amphipods can persist in smaller water bodies than fish, and many species in this  
310 group are ice-associated, being able to survive under ice cover and in its immediate forefield  
311 [87]. Both factors would have allowed some species to persist in the region throughout the  
312 glaciations. Additionally, as suggested for other invertebrates [69], some species likely  
313 survived in subterranean refugia, such as caves or groundwaters, habitats occupied by many  
314 freshwater amphipod species today, notably species of *Niphargus*, the most species-rich  
315 group in the region [29,32].

316 We found that endemic species in the terrestrial groups are much older than endemic fish  
317 species. Pleistocene refugia are hypothesized for terrestrial taxa in many geographically  
318 restricted areas on nunataks, i.e, mountain peaks that have never been glaciated [88], or  
319 surrounding the Alps [41,89–92], such that extinctions during the glacial cycles did not wipe  
320 out the terrestrial fauna entirely. It is very likely that terrestrial organisms, particularly  
321 butterflies [41,93], plants [94–96] and amphibians [71,72] survived in glacial refugia in the  
322 Alps and at its periphery. Therefore, differential impacts of Quaternary climate fluctuations

323 and the resulting glaciations on different habitats and taxa go a long way helping to explain  
324 extant patterns of diversity and endemism in the region.

325 (b) Dispersal ability to explain postglacial radiation

326 Dispersal ability often negatively correlates with rapid niche evolution. The evolutionary  
327 response to local environmental and ecological conditions tends to be faster in taxa with  
328 limited dispersal, leading to faster niche shifts and higher rates of speciation and adaptive  
329 radiation [97,98]. Therefore, the intriguingly few cases of postglacial speciation in fully  
330 terrestrial species and amphibians could be related to the dispersal rates imposed by the  
331 environments they occupy. Terrestrial taxa experience, in general, less dispersal limitation  
332 than freshwater taxa. For example, many species have acquired adaptations for aerial  
333 dispersal, such as active flying in butterflies [99,100] or passive airborne propagation in  
334 many plants [101], allowing such taxa to disperse virtually in all directions. Conversely,  
335 freshwater-bound taxa need to navigate the dendritic landscapes of rivers and lakes to  
336 disperse, making it a lot more difficult to reach isolated habitat patches [102,103]. Given  
337 these limitations to dispersal for many freshwater taxa, postglacial dispersal may have  
338 happened at a much slower pace in fish than for most terrestrial taxa. Terrestrial species may,  
339 hence, have expanded their ranges faster after glacial retreat, also likely facilitated by the  
340 proximity of refugia to the Alps (including inner-alpine refugia), resulting in faster  
341 recolonization of the newly open landscape through long-distance dispersal and range  
342 expansion. Some recent studies have shown that many plant species rapidly and substantially  
343 expanded their range during the recent postglacial period [104–106]. Faster filling of  
344 emerging terrestrial habitats through range expansion left fewer opportunities/less time for  
345 the first colonists to undergo ecological speciation and adaptive radiation in response to  
346 ecological opportunity among terrestrial groups than among aquatic taxa. To test the relative  
347 importance of dispersal limitation versus other aquatic/terrestrial differences, future work  
348 could investigate mainly aquatic taxa with strong aerial dispersal abilities, such as Odonata  
349 and other insects that spent most of their life cycle in freshwater and have short but highly  
350 dispersive terrestrial adult phases.

351 (c) Seasonal and interannual environmental variation limiting ecological speciation

352 Habitat stability in the Postglacial Era may have been an additional factor explaining the  
353 larger number of Holocene speciation events in fish, but not in terrestrial groups in our study.  
354 Theory and models suggest that environmental fluctuations and stochasticity can reduce or

355 even inhibit ecological speciation in unstable habitats [107,108]. Rapid variation in  
356 environmental conditions, both seasonal and interannual, make adaptation difficult and  
357 ecological speciation nearly impossible.

358 Environmental conditions in terrestrial ecosystems are much more variable than aquatic  
359 ecosystems [109,110], especially large and deep lakes, both in terms of seasonal and year-to-  
360 year variation. For instance, whereas seasonal variations in solar irradiance, temperature and  
361 snow cover make the high mountain terrestrial habitat extremely seasonal, with large year-to-  
362 year variation in the onset and duration of seasons [111,112], they are nearly constant through  
363 the year in the deeper parts of lakes [113,114]. The longer growing and reproductive season,  
364 despite low productivity, and the much more stable environment in deep lakes may create  
365 increased opportunities for ecological speciation and adaptive radiation compared to the  
366 alpine terrestrial ecosystems.

367 In addition, despite their greater temporal stability, deep lakes also have much steeper  
368 environmental gradients because pressure, light and temperature all change much faster with  
369 depth in water than with elevation in the terrestrial realm. This unique property of water may  
370 explain the high frequency of ecological speciation in deep lakes, with sister-species being  
371 spatially very close to each other but occupying different water depths [58], as observed  
372 among East African cichlids [115] and Alpine whitefish [116].

## 373 **5. Final considerations**

374 We suggest that the formation of the unique biota of the European Alps was driven by  
375 interacting mechanisms: non-random Pleistocene survival, postglacial immigration, vicariant  
376 speciation during glacial maxima and adaptive radiation in the Postglacial. These interacting  
377 mechanisms left distinct imprints on the age structure of regional assemblages in different  
378 biomes and associated taxon groups. Historical factors (Quaternary climate fluctuations and  
379 Pleistocene refuge availability) impacted freshwater and terrestrial biomes in different ways,  
380 and contemporary ecological factors such as environmental stochasticity and dispersal  
381 limitations also vary between these biomes, shaping them very differently through ecological  
382 and evolutionary processes. *In situ* speciation and adaptive radiation were prominent in fish,  
383 but occurred mainly after the LGM, and only in deep lakes, likely due to the unavailability of  
384 suitable freshwater habitat during the LGM and the stable conditions within habitats after the  
385 LGM. Amphipods and all terrestrial clades have much older endemic species, perhaps  
386 because their ecology (i.e., cold-resistant and groundwater-dwelling in amphipods) and the

387 availability of Pleistocene refugia within the region allowed many species to survive the  
388 LGM. At the same time, none of the terrestrial groups generated many young postglacial  
389 species, likely because higher Pleistocene survival and faster postglacial niche filling through  
390 range expansion left fewer ecological opportunities and because larger seasonal variation in  
391 the terrestrial environment places constraints on ecological speciation.

392 Knowing the history of biodiversity formation is crucial to establish effective strategies of  
393 conservation [117]. For the Alps we show a high fraction of endemism in many groups, with  
394 endemic species having survived in some taxa and ecosystems through repeated glacial  
395 cycles, while those in others are due to prolific speciation after the retreat of the glaciers.  
396 These results improve our understanding of how the Alpine hotspot of species diversity and  
397 endemism emerged, and they reinforce that biodiversity in this region is fragile. Endemic  
398 species are often range-restricted, show limited population size and are hence much more  
399 vulnerable to climate change and other environmental changes than non-endemic species  
400 [118], and because of that, they are of high concern for conservation. Even a comparatively  
401 small and transient disturbance of an ecosystem can lead to the extinction of young species  
402 that evolved in adaptation to specific ecological conditions as has already been observed in  
403 the recent past for adaptive radiations of fish in Swiss lakes [116]. The sharp increase of  
404 extinction rates driven by human activity in the Anthropocene threatens the biodiversity of  
405 the European Alps, and especially that of endemic species [119]. Therefore, this region  
406 deserves greater attention to conserve both the regional biodiversity, as well as the eco-  
407 evolutionary processes that gave rise to it and that are required to continue operating if  
408 biodiversity is to be maintained.

## 409 **References**

- 410 1. MacArthur RH, Wilson EO. 1963 An equilibrium theory of insular zoogeography.  
411 *Evolution* **17**, 373–387. (doi:10.2307/2407089)
- 412 2. MacArthur RH, Wilson EO. 1967 *The theory of island biogeography*. New Jersey:  
413 Princeton Univ. Press.
- 414 3. Rosindell J, Phillimore AB. 2011 A unified model of island biogeography sheds light on  
415 the zone of radiation. *Ecology Letters* **14**, 552–560. (doi:10.1111/j.1461-  
416 0248.2011.01617.x)
- 417 4. Warren BH *et al.* 2015 Islands as model systems in ecology and evolution: prospects  
418 fifty years after MacArthur-Wilson. *Ecology Letters* **18**, 200–217.  
419 (doi:10.1111/ele.12398)

- 420 5. Losos JB, Schluter D. 2000 Analysis of an evolutionary species–area relationship.  
421 *Nature* **408**, 847–850. (doi:10.1038/35048558)
- 422 6. Rosenzweig ML. 2001 Loss of speciation rate will impoverish future diversity. *PNAS*  
423 **98**, 5404–5410. (doi:10.1073/pnas.101092798)
- 424 7. Valente L *et al.* 2020 A simple dynamic model explains the diversity of island birds  
425 worldwide. *Nature* **579**, 92–96. (doi:10.1038/s41586-020-2022-5)
- 426 8. Merckx VSFT *et al.* 2015 Evolution of endemism on a young tropical mountain. *Nature*  
427 **524**, 347–350. (doi:10.1038/nature14949)
- 428 9. Willis JC. 1918 The age and area hypothesis. *Science* **47**, 626–628.
- 429 10. Gaston KJ. 1998 Species-range size distributions: products of speciation, extinction and  
430 transformation. *Philosophical Transactions of the Royal Society of London. Series B:*  
431 *Biological Sciences* **353**, 219–230. (doi:10.1098/rstb.1998.0204)
- 432 11. Ribas CC, Aleixo A, Nogueira ACR, Miyaki CY, Cracraft J. 2012 A  
433 palaeobiogeographic model for biotic diversification within Amazonia over the past  
434 three million years. *Proceedings of the Royal Society B: Biological Sciences* **279**, 681–  
435 689. (doi:10.1098/rspb.2011.1120)
- 436 12. Brown JH. 1984 On the relationship between abundance and distribution of species. *The*  
437 *American Naturalist* **124**, 255–279.
- 438 13. Svenning J-C, Skov F. 2004 Limited filling of the potential range in European tree  
439 species. *Ecology Letters* **7**, 565–573. (doi:https://doi.org/10.1111/j.1461-  
440 0248.2004.00614.x)
- 441 14. Smith BT *et al.* 2014 The drivers of tropical speciation. *Nature* **515**, 406–409.  
442 (doi:10.1038/nature13687)
- 443 15. Louthan AM, Doak DF, Angert AL. 2015 Where and when do species interactions set  
444 range limits? *Trends in Ecology & Evolution* **30**, 780–792.  
445 (doi:10.1016/j.tree.2015.09.011)
- 446 16. Grandcolas P, Nattier R, Trewick S. 2014 Relict species: a relict concept? *Trends in*  
447 *Ecology & Evolution* **29**, 655–663. (doi:10.1016/j.tree.2014.10.002)
- 448 17. Körner C. 2004 Mountain biodiversity, its causes and function. *ambi* **33**, 11–17.  
449 (doi:10.1007/0044-7447-33.sp13.11)
- 450 18. Rahbek C *et al.* 2019 Building mountain biodiversity: Geological and evolutionary  
451 processes. *Science* **365**, 1114–1119. (doi:10.1126/science.aax0151)
- 452 19. Rahbek C, Borregaard MK, Colwell RK, Dalsgaard B, Holt BG, Morueta-Holme N,  
453 Nogues-Bravo D, Whittaker RJ, Fjeldså J. 2019 Humboldt’s enigma: What causes  
454 global patterns of mountain biodiversity? *Science* **365**, 1108–1113.  
455 (doi:10.1126/science.aax0149)



- 456 20. Hughes C, Eastwood R. 2006 Island radiation on a continental scale: Exceptional rates  
457 of plant diversification after uplift of the Andes. *PNAS* **103**, 10334–10339.  
458 (doi:10.1073/pnas.0601928103)
- 459 21. Hughes CE, Atchison GW. 2015 The ubiquity of alpine plant radiations: from the Andes  
460 to the Hengduan Mountains. *New Phytologist* **207**, 275–282.  
461 (doi:https://doi.org/10.1111/nph.13230)
- 462 22. Bertuzzo E, Carrara F, Mari L, Altermatt F, Rodriguez-Iturbe I, Rinaldo A. 2016  
463 Geomorphic controls on elevational gradients of species richness. *PNAS* **113**, 1737–  
464 1742.
- 465 23. Gillespie RG *et al.* 2020 Comparing adaptive radiations across space, time, and taxa.  
466 *Journal of Heredity* **111**, 1–20. (doi:10.1093/jhered/esz064)
- 467 24. Comes HP, Kadereit JW. 2003 Spatial and temporal patterns in the evolution of the flora  
468 of the European Alpine System. *TAXON* **52**, 451–462.  
469 (doi:https://doi.org/10.2307/3647382)
- 470 25. Roquet C, Boucher FC, Thuiller W, Lavergne S. 2013 Replicated radiations of the  
471 alpine genus *Androsace* (Primulaceae) driven by range expansion and convergent key  
472 innovations. *Journal of Biogeography* **40**, 1874–1886.  
473 (doi:https://doi.org/10.1111/jbi.12135)
- 474 26. Zhang L-B, Peter Comes H, W. Kadereit J. 2015 The temporal course of Quaternary  
475 diversification in the European high mountain endemic *Primula* sect. *Auricula*  
476 (Primulaceae). *International Journal of Plant Sciences* (doi:10.1086/380747)
- 477 27. Peña C, Witthauer H, Klečková I, Fric Z, Wahlberg N. 2015 Adaptive radiations in  
478 butterflies: evolutionary history of the genus *Erebia* (Nymphalidae: Satyrinae). *Biol J*  
479 *Linn Soc* **116**, 449–467. (doi:10.1111/bij.12597)
- 480 28. Pitteloud C *et al.* 2017 Climatic niche evolution is faster in sympatric than allopatric  
481 lineages of the butterfly genus *Pyrgus*. *Proceedings of the Royal Society B: Biological*  
482 *Sciences* **284**, 20170208. (doi:10.1098/rspb.2017.0208)
- 483 29. Altermatt F, Alther R, Fišer C, Jokela J, Konec M, Küry D, Mächler E, Stucki P,  
484 Westram AM. 2014 Diversity and distribution of freshwater amphipod species in  
485 Switzerland (Crustacea: Amphipoda). *PLOS ONE* **9**, e110328.  
486 (doi:10.1371/journal.pone.0110328)
- 487 30. Fišer C, Delić T, Luštrik R, Zagnajster M, Altermatt F. 2019 Niches within a niche:  
488 ecological differentiation of subterranean amphipods across Europe’s interstitial waters.  
489 *Ecography* **42**, 1212–1223. (doi:https://doi.org/10.1111/ecog.03983)
- 490 31. Zakšek V, Delić T, Fišer C, Jalžić B, Trontelj P. 2019 Emergence of sympatry in a  
491 radiation of subterranean amphipods. *Journal of Biogeography* **46**, 657–669.  
492 (doi:https://doi.org/10.1111/jbi.13514)
- 493 32. Borko Š, Trontelj P, Seehausen O, Moškrič A, Fišer C. 2021 A subterranean adaptive  
494 radiation of amphipods in Europe. *Nat Commun* **12**, 3688. (doi:10.1038/s41467-021-  
495 24023-w)



- 496 33. Hudson AG, Vonlanthen P, Seehausen O. 2011 Rapid parallel adaptive radiations from  
497 a single hybridogenetic ancestral population. *Proc. R. Soc. B.* **278**, 58–66.  
498 (doi:10.1098/rspb.2010.0925)
- 499 34. Lucek K, Keller I, Nolte AW, Seehausen O. 2018 Distinct colonization waves underlie  
500 the diversification of the freshwater sculpin (*Cottus gobio*) in the Central European  
501 Alpine region. *Journal of Evolutionary Biology* **31**, 1254–1267. (doi:10.1111/jeb.13339)
- 502 35. Fiebig M, Preusser F. 2008 Pleistocene glaciations of the northern Alpine Foreland.  
503 *Geographica Helvetica* **63**, 145–150. (doi:10.5194/gh-63-145-2008)
- 504 36. Hewitt GM. 1999 Post-glacial re-colonization of European biota. *Biological Journal of*  
505 *the Linnean Society* **68**, 87–112. (doi:10.1111/j.1095-8312.1999.tb01160.x)
- 506 37. Hewitt G. 2000 The genetic legacy of the Quaternary ice ages. *Nature* **405**, 907–913.  
507 (doi:10.1038/35016000)
- 508 38. Hänfling B, Hellems B, Volckaert F a. M, Carvalho GR. 2002 Late glacial history of  
509 the cold-adapted freshwater fish *Cottus gobio*, revealed by microsatellites. *Molecular*  
510 *Ecology* **11**, 1717–1729. (doi:https://doi.org/10.1046/j.1365-294X.2002.01563.x)
- 511 39. Stehlik I. 2003 Resistance or emigration? Response of alpine plants to the ice ages.  
512 *TAXON* **52**, 499–510. (doi:https://doi.org/10.2307/3647448)
- 513 40. Neuenschwander S, Lurgiader CR, Ray N, Currat M, Vonlanthen P, Excoffier L. 2008  
514 Colonization history of the Swiss Rhine basin by the bullhead (*Cottus gobio*): inference  
515 under a Bayesian spatially explicit framework. *Molecular Ecology* **17**, 757–772.  
516 (doi:10.1111/j.1365-294X.2007.03621.x)
- 517 41. Menchetti M *et al.* 2021 Two ways to be endemic. Alps and Apennines are different  
518 functional refugia during climatic cycles. *Molecular Ecology* **30**, 1297–1310.  
519 (doi:https://doi.org/10.1111/mec.15795)
- 520 42. Médail F, Diadema K. 2009 Glacial refugia influence plant diversity patterns in the  
521 Mediterranean Basin. *Journal of Biogeography* **36**, 1333–1345.  
522 (doi:https://doi.org/10.1111/j.1365-2699.2008.02051.x)
- 523 43. Holm SR, Svenning J-C. 2014 180,000 years of climate change in Europe: Avifaunal  
524 responses and vegetation implications. *PLOS ONE* **9**, e94021.  
525 (doi:10.1371/journal.pone.0094021)
- 526 44. Ordonez A, Svenning J-C. 2017 Consistent role of Quaternary climate change in  
527 shaping current plant functional diversity patterns across European plant orders. *Sci Rep*  
528 **7**, 42988. (doi:10.1038/srep42988)
- 529 45. Schoville SD, Roderick GK, Kavanaugh DH. 2012 Testing the ‘Pleistocene species  
530 pump’ in alpine habitats: lineage diversification of flightless ground beetles (Coleoptera:  
531 Carabidae: *Nebria*) in relation to altitudinal zonation. *Biological Journal of the Linnean*  
532 *Society* **107**, 95–111. (doi:10.1111/j.1095-8312.2012.01911.x)

- 533 46. April J, Hanner RH, Dion-Côté A-M, Bernatchez L. 2013 Glacial cycles as an allopatric  
534 speciation pump in north-eastern American freshwater fishes. *Molecular Ecology* **22**,  
535 409–422. (doi:<https://doi.org/10.1111/mec.12116>)
- 536 47. Schluter D, Rambaut A, Clarke BC, Grant PR. 1996 Ecological speciation in postglacial  
537 fishes. *Philosophical Transactions of the Royal Society of London. Series B: Biological*  
538 *Sciences* **351**, 807–814. (doi:10.1098/rstb.1996.0075)
- 539 48. Hewitt GM. 2004 Genetic consequences of climatic oscillations in the Quaternary.  
540 *Philosophical Transactions of the Royal Society of London. Series B: Biological*  
541 *Sciences* **359**, 183–195. (doi:10.1098/rstb.2003.1388)
- 542 49. Holderegger R, Thiel-Egenter C. 2009 A discussion of different types of glacial refugia  
543 used in mountain biogeography and phylogeography. *Journal of Biogeography* **36**, 476–  
544 480. (doi:<https://doi.org/10.1111/j.1365-2699.2008.02027.x>)
- 545 50. Bermingham E, Rohwer S, Freeman S, Wood C. 1992 Vicariance biogeography in the  
546 Pleistocene and speciation in North American wood warblers: a test of Mengel’s model.  
547 *PNAS* **89**, 6624–6628.
- 548 51. Culling MA, Janko K, Boron A, Vasil’ev VP, Côté IM, Hewitt GM. 2006 European  
549 colonization by the spined loach (*Cobitis taenia*) from Ponto-Caspian refugia based on  
550 mitochondrial DNA variation. *Molecular Ecology* **15**, 173–190.  
551 (doi:<https://doi.org/10.1111/j.1365-294X.2005.02790.x>)
- 552 52. Provan J, Bennett KD. 2008 Phylogeographic insights into cryptic glacial refugia.  
553 *Trends in Ecology & Evolution* **23**, 564–571. (doi:10.1016/j.tree.2008.06.010)
- 554 53. Wallis GP, Waters JM, Upton P, Craw D. 2016 Transverse alpine speciation driven by  
555 glaciation. *Trends in Ecology & Evolution* **31**, 916–926.  
556 (doi:10.1016/j.tree.2016.08.009)
- 557 54. Stroud JT, Losos JB. 2016 Ecological opportunity and adaptive radiation. *Annu. Rev.*  
558 *Ecol. Evol. Syst* **47**, 507–532.
- 559 55. Schluter D. 2000 *The ecology of adaptive radiation*. OUP Oxford.
- 560 56. Bernatchez L, Chouinard A, Lu G. 1999 Integrating molecular genetics and ecology in  
561 studies of adaptive radiation: whitefish, *Coregonus* sp., as a case study. *Biological*  
562 *Journal of the Linnean Society* **68**, 173–194. (doi:10.1111/j.1095-8312.1999.tb01165.x)
- 563 57. Bolnick DI, Lau OL. 2008 Predictable patterns of disruptive selection in stickleback in  
564 postglacial lakes. *The American Naturalist* **172**, 1–11. (doi:10.1086/587805)
- 565 58. Seehausen O, Wagner C. 2014 Speciation in freshwater fishes. *Annual review of*  
566 *ecology, evolution, and systematics* **45**, 621–651. (doi:10.1146/annurev-ecolsys-120213-  
567 091818)
- 568 59. Doenz CJ, Krähenbühl AK, Walker J, Seehausen O, Brodersen J. 2019 Ecological  
569 opportunity shapes a large Arctic charr species radiation. *Proceedings of the Royal*  
570 *Society B: Biological Sciences* **286**, 20191992. (doi:10.1098/rspb.2019.1992)

- 571 60. Kangas V-M, Kvist L, Kholodova M, Nygrén T, Danilov P, Panchenko D, Fraimout A,  
572 Aspi J. 2015 Evidence of post-glacial secondary contact and subsequent anthropogenic  
573 influence on the genetic composition of Fennoscandian moose (*Alces alces*). *Journal of*  
574 *Biogeography* **42**, 2197–2208. (doi:<https://doi.org/10.1111/jbi.12582>)
- 575 61. Seehausen O. 2004 Hybridization and adaptive radiation. *Trends in Ecology &*  
576 *Evolution* **19**, 198–207. (doi:[10.1016/j.tree.2004.01.003](https://doi.org/10.1016/j.tree.2004.01.003))
- 577 62. Meier JJ, Marques DA, Mwaiko S, Wagner CE, Excoffier L, Seehausen O. 2017  
578 Ancient hybridization fuels rapid cichlid fish adaptive radiations. *Nat Commun* **8**,  
579 14363. (doi:[10.1038/ncomms14363](https://doi.org/10.1038/ncomms14363))
- 580 63. Seehausen O. 2013 Conditions when hybridization might predispose populations for  
581 adaptive radiation. *J Evol Biol* **26**, 279–281. (doi:[10.1111/jeb.12026](https://doi.org/10.1111/jeb.12026))
- 582 64. Goldberg EE, Roy K, Lande R, Jablonski D. 2005 Diversity, endemism, and age  
583 distributions in macroevolutionary sources and sinks. *The American Naturalist* **165**,  
584 623–633. (doi:[10.1086/430012](https://doi.org/10.1086/430012))
- 585 65. Pellissier L *et al.* 2014 Quaternary coral reef refugia preserved fish diversity. *Science*  
586 **344**, 1016–1019. (doi:[10.1126/science.1249853](https://doi.org/10.1126/science.1249853))
- 587 66. Ding W-N, Ree RH, Spicer RA, Xing Y-W. 2020 Ancient orogenic and monsoon-  
588 driven assembly of the world’s richest temperate alpine flora. *Science* **369**, 578–581.  
589 (doi:[10.1126/science.abb4484](https://doi.org/10.1126/science.abb4484))
- 590 67. Rull V. 2008 Speciation timing and neotropical biodiversity: the Tertiary–Quaternary  
591 debate in the light of molecular phylogenetic evidence. *Molecular Ecology* **17**, 2722–  
592 2729. (doi:<https://doi.org/10.1111/j.1365-294X.2008.03789.x>)
- 593 68. Seguinot J, Ivy-Ochs S, Jouvet G, Huss M, Funk M, Preusser F. 2018 Modelling last  
594 glacial cycle ice dynamics in the Alps. *The Cryosphere* **12**, 3265–3285.  
595 (doi:<https://doi.org/10.5194/tc-12-3265-2018>)
- 596 69. Christian E. 2002 Distribution patterns of cavernicolous Collembola in Austria.  
597 *Pedobiologia* **46**, 261–266. (doi:[10.1078/0031-4056-00132](https://doi.org/10.1078/0031-4056-00132))
- 598 70. Wells KD. 2010 *The ecology and behavior of amphibians*. University of Chicago Press.
- 599 71. Vörös J, Mikulíček P, Major Á, Recuero E, Arntzen JW. 2016 Phylogeographic analysis  
600 reveals northerly refugia for the riverine amphibian *Triturus dobrogicus* (Caudata:  
601 Salamandridae). *Biological Journal of the Linnean Society* **119**, 974–991.  
602 (doi:[10.1111/bij.12866](https://doi.org/10.1111/bij.12866))
- 603 72. Lucati F *et al.* 2020 Multiple glacial refugia and contemporary dispersal shape the  
604 genetic structure of an endemic amphibian from the Pyrenees. *Molecular Ecology* **29**,  
605 2904–2921. (doi:[10.1111/mec.15521](https://doi.org/10.1111/mec.15521))
- 606 73. Schmitt T. 2017 Molecular biogeography of the high mountain systems of Europe: An  
607 overview. In *High Mountain Conservation in a Changing World* (eds J Catalan, JM  
608 Ninot, MM Aniz), pp. 63–74. Cham: Springer International Publishing.  
609 (doi:[10.1007/978-3-319-55982-7\\_3](https://doi.org/10.1007/978-3-319-55982-7_3))

- 610 74. Hothorn T, Hornik K, van de Wiel MA, Zeileis A. 2008 Implementing a class of  
611 permutation Tests: The coin package. *J. Stat. Softw.* **28**, 1–23.
- 612 75. R Core Team. 2020 *R: A language and environment for statistical computing*. Vienna: R  
613 Foundation for Statistical Computing. See <https://www.R-project.org/>.
- 614 76. Ager DV. 1975 The geological evolution of Europe. *Proceedings of the Geologists’*  
615 *Association* **86**, 127–154. (doi:10.1016/S0016-7878(75)80097-6)
- 616 77. Seifertová M, Bryja J, Vyskočilová M, Martínková N, Šimková A. 2012 Multiple  
617 Pleistocene refugia and post-glacial colonization in the European chub (*Squalius*  
618 *cephalus*) revealed by combined use of nuclear and mitochondrial markers. *Journal of*  
619 *Biogeography* **39**, 1024–1040. (doi:<https://doi.org/10.1111/j.1365-2699.2011.02661.x>)
- 620 78. Klemetsen A, Amundsen P-A, Dempson JB, Jonsson B, Jonsson N, O’Connell MF,  
621 Mortensen E. 2003 Atlantic salmon *Salmo salar* L., brown trout *Salmo trutta* L. and  
622 Arctic charr *Salvelinus alpinus* (L.): a review of aspects of their life histories. *Ecology of*  
623 *Freshwater Fish* **12**, 1–59. (doi:10.1034/j.1600-0633.2003.00010.x)
- 624 79. Hudson AG, Lundsgaard Hansen B, Lucek K, Vonlanthen P, Seehausen O. 2017  
625 Managing cryptic biodiversity: Fine-scale intralacustrine speciation along a benthic  
626 gradient in Alpine whitefish (*Coregonus* spp.). *Evolutionary Applications* **10**, 251–266.  
627 (doi:<https://doi.org/10.1111/eva.12446>)
- 628 80. Freyhof J, Kottelat M. 2007 *Handbook of European freshwater fishes*. See  
629 <https://portals.iucn.org/library/node/9068>.
- 630 81. Splendiani A, Ruggeri P, Giovannotti M, Pesaresi S, Occhipinti G, Fioravanti T,  
631 Lorenzoni M, Nisi Cerioni P, Caputo Barucchi V. 2016 Alien brown trout invasion of  
632 the Italian peninsula: the role of geological, climate and anthropogenic factors. *Biol*  
633 *Invasions* **18**, 2029–2044. (doi:10.1007/s10530-016-1149-7)
- 634 82. Vonlanthen P, Roy D, Hudson AG, Largiadèr CR, Bittner D, Seehausen O. 2009  
635 Divergence along a steep ecological gradient in lake whitefish (*Coregonus* sp.). *Journal*  
636 *of Evolutionary Biology* **22**, 498–514. (doi:[https://doi.org/10.1111/j.1420-](https://doi.org/10.1111/j.1420-9101.2008.01670.x)  
637 [9101.2008.01670.x](https://doi.org/10.1111/j.1420-9101.2008.01670.x))
- 638 83. McGee MD *et al.* 2020 The ecological and genomic basis of explosive adaptive  
639 radiation. *Nature* **586**, 75–79. (doi:10.1038/s41586-020-2652-7)
- 640 84. Levin BA *et al.* 2019 Phylogeny, phylogeography and hybridization of Caucasian  
641 barbels of the genus *Barbus* (Actinopterygii, Cyprinidae). *Molecular Phylogenetics and*  
642 *Evolution* **135**, 31–44. (doi:10.1016/j.ympev.2019.02.025)
- 643 85. Levin BA, Simonov E, Dgebuadze YY, Levina M, Golubtsov AS. 2020 In the rivers:  
644 Multiple adaptive radiations of cyprinid fishes (*Labeobarbus*) in Ethiopian Highlands.  
645 *Sci Rep* **10**, 7192. (doi:10.1038/s41598-020-64350-4)
- 646 86. Levin B, Simonov E, Franchini P, Muge N, Golubtsov A, Meyer A. 2021 Adaptive  
647 radiation and burst speciation of hillstream cyprinid fish *Garra* in African river. *bioRxiv*  
648 (doi:<https://doi.org/10.1101/2021.05.04.442598>)

- 649 87. Vader W, Tandberg AHS. 2019 Gammarid amphipods (Crustacea) in Norway, with a  
650 key to the species. *Fauna Norvegica* (doi:10.5324/fn.v39i0.2873)
- 651 88. Nordal I. 1987 Tabula rasa after all? Botanical evidence for ice-free refugia in  
652 Scandinavia reviewed. *Journal of Biogeography* **14**, 377–388. (doi:10.2307/2844945)
- 653 89. Taberlet P, Fumagalli L, Wust-Saucy A-G, Cosson J-F. 1998 Comparative  
654 phylogeography and postglacial colonization routes in Europe. *Molecular Ecology* **7**,  
655 453–464. (doi:<https://doi.org/10.1046/j.1365-294x.1998.00289.x>)
- 656 90. Schmitt T. 2009 Biogeographical and evolutionary importance of the European high  
657 mountain systems. *Frontiers in Zoology* **6**, 9. (doi:10.1186/1742-9994-6-9)
- 658 91. Saladin B, Pellissier L, Graham CH, Nobis MP, Salamin N, Zimmermann NE. 2020  
659 Rapid climate change results in long-lasting spatial homogenization of phylogenetic  
660 diversity. *Nat Commun* **11**, 4663. (doi:10.1038/s41467-020-18343-6)
- 661 92. Pan D, Hülber K, Willner W, Schneeweiss GM. 2020 An explicit test of Pleistocene  
662 survival in peripheral versus nunatak refugia in two high mountain plant species.  
663 *Molecular Ecology* **29**, 172–183. (doi:10.1111/mec.15316)
- 664 93. Schmitt T, Louy D, Zimmermann E, Habel JC. 2016 Species radiation in the Alps:  
665 multiple range shifts caused diversification in Ringlet butterflies in the European high  
666 mountains. *Org Divers Evol* **16**, 791–808. (doi:10.1007/s13127-016-0282-6)
- 667 94. Willis KJ. 1996 Where did all the flowers go? The fate of temperate European flora  
668 during glacial periods. *Endeavour* **20**, 110–114. (doi:10.1016/0160-9327(96)10019-3)
- 669 95. Schönswetter P, Stehlik I, Holderegger R, Tribsch A. 2005 Molecular evidence for  
670 glacial refugia of mountain plants in the European Alps. *Molecular Ecology* **14**, 3547–  
671 3555. (doi:<https://doi.org/10.1111/j.1365-294X.2005.02683.x>)
- 672 96. Szövényi P, Arroyo K, Guggisberg A, Conti E. 2009 Effects of Pleistocene glaciations  
673 on the genetic structure of *Saxifraga florulenta* (Saxifragaceae), a rare endemic of the  
674 Maritime Alps. *TAXON* **58**, 532–543. (doi:<https://doi.org/10.1002/tax.582017>)
- 675 97. Patterson TB, Givnish TJ. 2004 Geographic cohesion, chromosomal evolution, parallel  
676 adaptive radiations, and consequent floral adaptations in *Calochortus* (Calochortaceae):  
677 evidence from a cpDNA phylogeny. *New Phytologist* **161**, 253–264.  
678 (doi:<https://doi.org/10.1046/j.1469-8137.2003.00951.x>)
- 679 98. Price JP, Wagner WL. 2004 Speciation in Hawaiian Angiosperm lineages: cause,  
680 consequence, and mode. *evol* **58**, 2185–2200. (doi:10.1554/03-498)
- 681 99. Stevens VM, Turlure C, Baguette M. 2010 A meta-analysis of dispersal in butterflies.  
682 *Biological Reviews* **85**, 625–642. (doi:10.1111/j.1469-185X.2009.00119.x)
- 683 100. Stevens VM, Trochet A, Dyck HV, Clobert J, Baguette M. 2012 How is dispersal  
684 integrated in life histories: A quantitative analysis using butterflies. *Ecology Letters* **15**,  
685 74–86. (doi:10.1111/j.1461-0248.2011.01709.x)



- 686 101. Frei T. 1997 Pollen distribution at high elevation in Switzerland: Evidence for medium  
687 range transport. *Grana* **36**, 34–38. (doi:10.1080/00173139709362587)
- 688 102. Brown BL, Swan CM. 2010 Dendritic network structure constrains metacommunity  
689 properties in riverine ecosystems. *Journal of Animal Ecology* **79**, 571–580.  
690 (doi:10.1111/j.1365-2656.2010.01668.x)
- 691 103. Altermatt F. 2013 Diversity in riverine metacommunities: a network perspective. *Aquat*  
692 *Ecol* **47**, 365–377. (doi:10.1007/s10452-013-9450-3)
- 693 104. Magri D *et al.* 2006 A new scenario for the Quaternary history of European beech  
694 populations: palaeobotanical evidence and genetic consequences. *New Phytologist* **171**,  
695 199–221. (doi:10.1111/j.1469-8137.2006.01740.x)
- 696 105. Tinner W, Lotter AF. 2006 Holocene expansions of *Fagus sylvatica* and *Abies alba* in  
697 Central Europe: where are we after eight decades of debate? *Quaternary Science*  
698 *Reviews* **25**, 526–549. (doi:10.1016/j.quascirev.2005.03.017)
- 699 106. Magri D. 2008 Patterns of post-glacial spread and the extent of glacial refugia of  
700 European beech (*Fagus sylvatica*). *Journal of Biogeography* **35**, 450–463.  
701 (doi:10.1111/j.1365-2699.2007.01803.x)
- 702 107. Johansson J, Ripa J. 2006 Will sympatric speciation fail due to stochastic competitive  
703 exclusion? *The American Naturalist* **168**, 572–578. (doi:10.1086/507996)
- 704 108. Ripa J, Dieckmann U. 2013 Mutant invasions and adaptive dynamics in variable  
705 environments. *Evolution* **67**, 1279–1290. (doi:https://doi.org/10.1111/evo.12046)
- 706 109. Halley JM. 2005 Comparing aquatic and terrestrial variability: at what scale do  
707 ecologists communicate? *Marine Ecology Progress Series* **304**, 274–280.
- 708 110. Steele JH, Brink KH, Scott BE. 2019 Comparison of marine and terrestrial ecosystems:  
709 suggestions of an evolutionary perspective influenced by environmental variation. *ICES*  
710 *Journal of Marine Science* **76**, 50–59. (doi:10.1093/icesjms/fsy149)
- 711 111. Häder D-P, Barnes PW. 2019 Comparing the impacts of climate change on the  
712 responses and linkages between terrestrial and aquatic ecosystems. *Science of The Total*  
713 *Environment* **682**, 239–246. (doi:10.1016/j.scitotenv.2019.05.024)
- 714 112. Liu J, Liu J, Linderholm HW, Chen D, Yu Q, Wu D, Haginoya S. 2012 Observation and  
715 calculation of the solar radiation on the Tibetan Plateau. *Energy Conversion and*  
716 *Management* **57**, 23–32. (doi:10.1016/j.enconman.2011.12.007)
- 717 113. Fenocchi A, Rogora M, Sibilla S, Dresti C. 2017 Relevance of inflows on the  
718 thermodynamic structure and on the modeling of a deep subalpine lake (Lake Maggiore,  
719 Northern Italy/Southern Switzerland). *Limnologica* **63**, 42–56.  
720 (doi:10.1016/j.limno.2017.01.006)
- 721 114. Arai T. 1981 Attenuation of Incident Solar Radiation in Lake Water. *Jap. J. Limnol.* **42**,  
722 92–99. (doi:10.3739/rikusui.42.92)

- 723 115. Wagner CE, Harmon LJ, Seehausen O. 2014 Cichlid species-area relationships are  
724 shaped by adaptive radiations that scale with area. *Ecology Letters* **17**, 583–592.  
725 (doi:<https://doi.org/10.1111/ele.12260>)
- 726 116. Vonlanthen P *et al.* 2012 Eutrophication causes speciation reversal in whitefish adaptive  
727 radiations. *Nature* **482**, 357–362. (doi:[10.1038/nature10824](https://doi.org/10.1038/nature10824))
- 728 117. Posadas P, Esquivel DRM, Crisci JV. 2001 Using phylogenetic diversity measures to set  
729 priorities in conservation: An example from southern South America. *Conservation*  
730 *Biology* **15**, 1325–1334. (doi:[10.1111/j.1523-1739.2001.99404.x](https://doi.org/10.1111/j.1523-1739.2001.99404.x))
- 731 118. Manes S *et al.* 2021 Endemism increases species' climate change risk in areas of global  
732 biodiversity importance. *Biological Conservation* **257**, 109070.  
733 (doi:[10.1016/j.biocon.2021.109070](https://doi.org/10.1016/j.biocon.2021.109070))
- 734 119. Johnson CN, Balmford A, Brook BW, Buettel JC, Galetti M, Guangchun L, Wilmshurst  
735 JM. 2017 Biodiversity losses and conservation responses in the Anthropocene. *Science*  
736 **356**, 270–275. (doi:[10.1126/science.aam9317](https://doi.org/10.1126/science.aam9317))

737

### 738 **Acknowledgements**

739 We would like to thank Salome Mwaiko and Rosi Siber for laboratory and GIS support,  
740 respectively, and Timothy Alexander for his work in the execution of the *Projet Lac*.  
741 Info Fauna provided distribution data of Swiss fishes. For sharing published phylogenetic  
742 trees, we thank Natalia Tkach, Adrien Favre, Józef Mitka, Carmen Benitez-Benitez, Markus  
743 Dillenberger, Andrew Crawl and Božo Frajman. We are also grateful to Kay Lucek, Hanna  
744 ten Brink and Catalina Chaparro for thoughtful and constructive discussion. Funding from the  
745 ETH Board through the Blue-Green Biodiversity (BGB) Initiative (BGB 2020) is  
746 acknowledged. ŠB was supported by Slovenian Research Agency through funding  
747 programme P1-0184, project J1-2464 and PhD grant.



748 **Figure captions**

749

750 **Figure 1.** Evolutionary and ecological history of a hypothetical biodiversity assembly in an  
751 alpine-like system. A) Biodiversity in a preglacial phase. B) Early glacial phase: glacial  
752 periods erase freshwater habitats and fragment the terrestrial biome. Some populations  
753 survive in refugia and C) can diverge into distinct species through allopatric speciation. D)  
754 The retreat of glaciers opens up new, unoccupied habitats offering ecological opportunities  
755 for colonizers. E) Some colonizers undergo adaptive radiation and niche space is filled up  
756 again.

757

758 **Figure 2.** Species age distribution (SAD) of endemic and non-endemic species of, from top  
759 to bottom, amphibians, amphipods, butterflies, fish and flowering plants. Pie charts show the  
760 proportion of endemic and non-endemic species as well as the proportion of endemic species  
761 that have emerged through cladogenetic or anagenetic speciation.

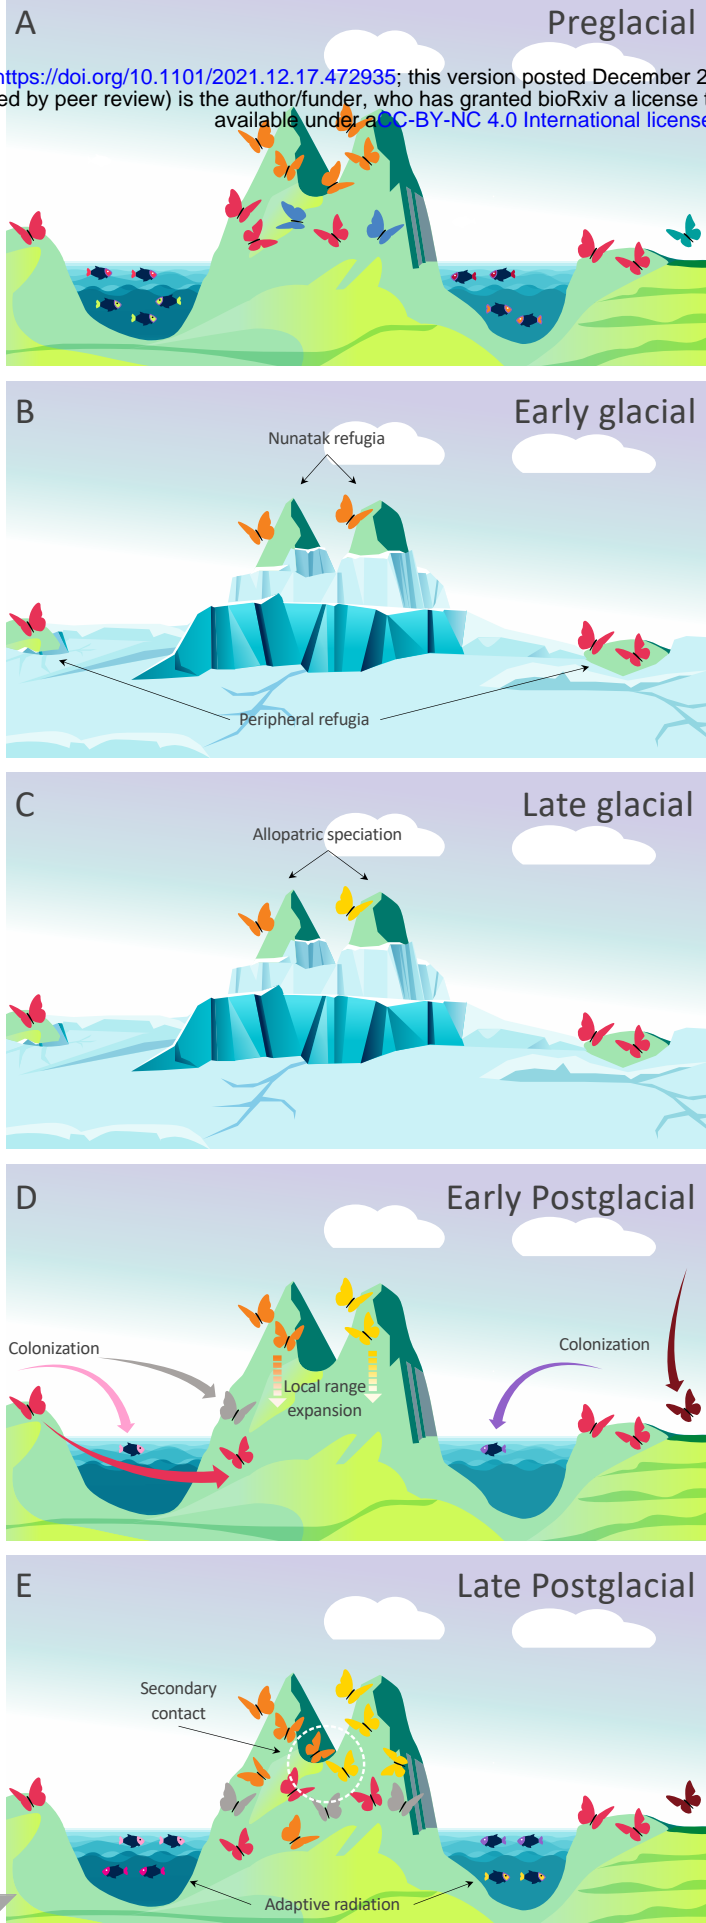

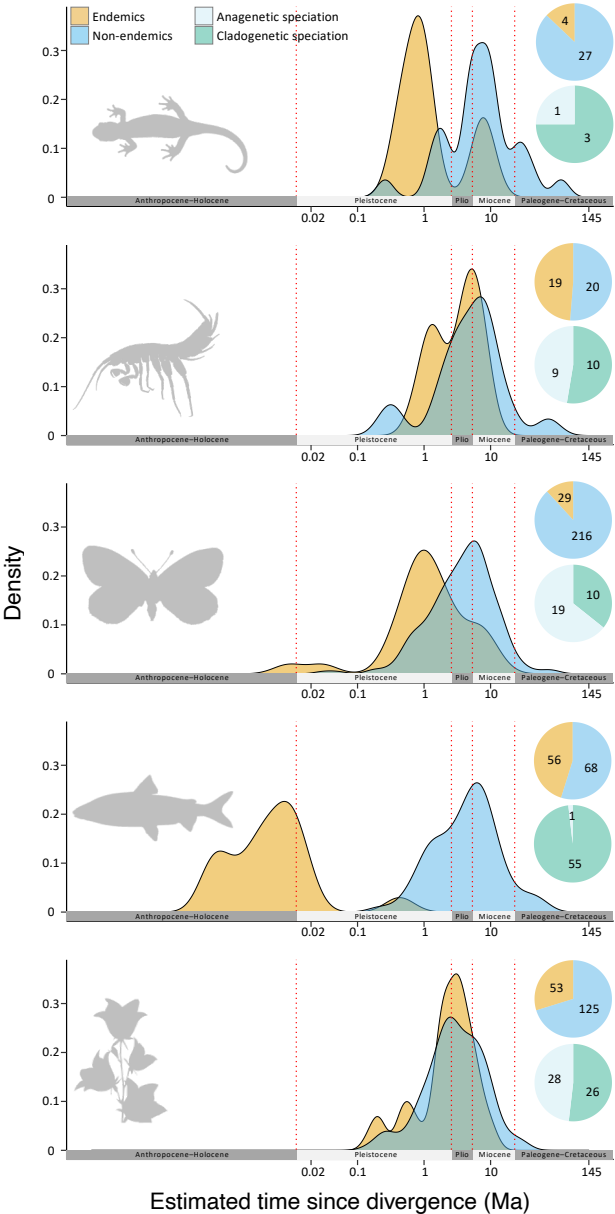

Source: https://www.biorxiv.org/content/10.1101/2021.12.17.472935v1.full.pdf
